# Supplementary material
Source: PubMed Central journal article supplement (PMC2708928)
Supplement: NIHMS110770-supplement-Supplemental_Figure_1.pdf [file NIHMS110770-supplement-Supplemental_Figure_1.pdf]

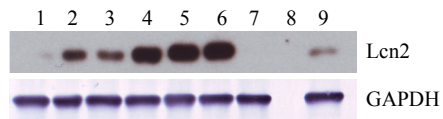

**Figure S1. Synergistic IL-17 and TNF $\alpha$  stimulation.** Image of the Western analysis described in Figure 1A, including the lane with TNF $\alpha$  stimulation alone, which is omitted in Figure 1A for consistency with panel 1B. Lane 1 – IL-17A, lane 2 – IL-17F, lane 3 – IL-17A+IL-17F, lane 4 – IL-17A+TNF $\alpha$ , lane 5 – IL-17F+TNF $\alpha$ , lane 6, IL-17A+IL-17F+TNF $\alpha$ , lane 7 – unstimulated, lane 8 – empty, lane 9 – TNF $\alpha$  alone.
