# Supplementary material
Source: PubMed Central journal article supplement (PMC2708928)
Supplement: NIHMS110770-supplement-Supplemental_Figure_2.pdf [file NIHMS110770-supplement-Supplemental_Figure_2.pdf]

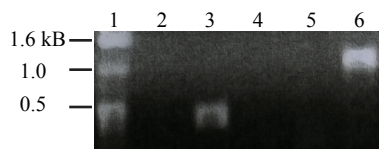

**Figure S2. KP strain 43816 is an aerobactin negative strain.** KP lysates underwent PCR analysis for aerobactin (500 bp amplicon) as described. Lane 1- molecular weight standard, lane 2 – KP ATCC strain 43816, lane 3 – known aerobactin-positive KP strain, lane 4 – known aerobactin-negative KP strain, lane 5 – known aerobactin-negative *E. coli* strain, lane 6 – positive control for PCR using irrelevant primers and KP 43816 lysate.
