# Supplementary material
Source: PubMed Central journal article supplement (PMC2708928)
Supplement: NIHMS110770-supplement-Supplemental_Figure_3.pdf [file NIHMS110770-supplement-Supplemental_Figure_3.pdf]

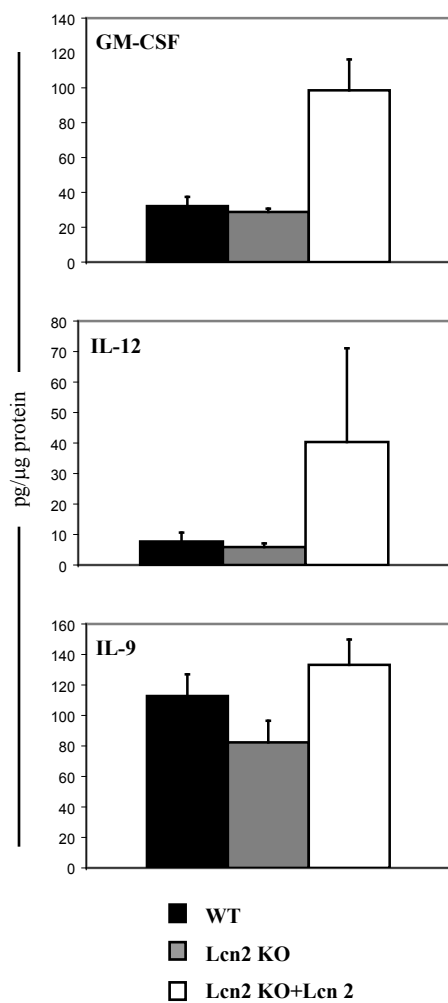

**Figure S3. Lipocalin 2 augments anti-infective cytokines while increasing anti-inflammatory cytokines.** Lcn2 KO mice and their strain controls (6 mice/group) were infected with KP as described. Six Lcn2 KO mice were given intratracheal lipocalin 2. Multiplex cytokine analysis was done on lung homogenates obtained after 12 h of infection.
